# Supplementary material
Source: publisher figshare collection journal article supplement (https://karger.figshare.com/ndownloader/files/24493295)
Supplement: Supplementary file 1 [file 24493295]

**Suppl. Table 6. Multivariate analysis of the risk factors for combined events in patients with renal TMA**

|  | Hazard ratio | 95% Confidence intervals | | *P* value |
| --- | --- | --- | --- | --- |
| Lower | Upper |
| MAP | 1.01 | 0.99 | 1.04 | 0.256 |
| eGFR | 0.99 | 0.97 | 1.00 | 0.136 |
| FPW | | | | |
| FPW <869nm | 1 |  |  |  |
| FPW ≥869nm | 3.64 | 1.37 | 9.66 | **0.009** |
| Endothelial cell swelling and subintimal myxoid edema score | | | | |
| 0-1 | 1 |  |  | 0.871 |
| 2 | 1.02 | 0.34 | 3.06 | 0.977 |
| 3 | 1.25 | 0.49 | 3.16 | 0.642 |
| Onion skin lesion score | | | | |
| 0 | 1 |  |  | 0.172 |
| 1-2 | 3.85 | 0.94 | 15.80 | 0.062 |
| 3 | 3.63 | 0.76 | 17.32 | 0.106 |
| Tubular atrophy/interstitial fibrosis | | | | |
| 1 | 1 |  |  | 0.384 |
| 2 | 2.09 | 0.56 | 7.85 | 0.275 |
| 3 | 2.28 | 0.69 | 7.55 | 0.179 |
| Abbreviations: TMA, thrombotic microangiopathy; MAP, mean arterial pressure; eGFR, estimated glomerular filtration rate; FPW, foot process width. | | | | |
